# Supplementary material
Source: HighWire-hosted journal article supplement (https://www.jneurosci.org/highwire/filestream/598815/field_highwire_adjunct_files/2/Supplemental_Legend.pdf)
Supplement: Supplemental_Legend.pdf [file Supplemental_Legend.pdf]

Supplementary Figure 1. Stability of firing rate and preferred direction during plan period. (A) Change in firing rate across 1000 reaches for all neuron-direction pairs for monkeys G and H. (B) Shift in preferred direction between first half and last half of trials.

Supplementary Figure 2. Linear model performance for Monkey G.  $\rho$  value indicates correlation between parameters predicted using each test epoch (abscissa) and final five minutes of behavior. Neurons are sorted by  $\rho$  value in epoch 1 on the ordinate. (A) X-position decode. (B) Y-position decode. (C) X-velocity decode. (D) Y-velocity decode.
